# Supplementary material
Source: PubMed Central journal article supplement (PMC8095015)
Supplement: mmc2.pdf [file mmc2.pdf]

**Supplementary Table 2:** p-value of the significant features extracted using ANOVA

| <b>Feature No.</b> | <b>Feature Name</b>                                   | <b>p</b>   |
|--------------------|-------------------------------------------------------|------------|
| 1                  | <b>Firstorder 10 Percentile</b>                       | 0.045053   |
| 2                  | <b>Firstorder 90 Percentile</b>                       | 1.73E-05   |
| 3                  | <b>Firstorder Entropy</b>                             | 0.00967319 |
| 4                  | <b>Firstorder Interquartile Range</b>                 | 0.00146048 |
| 5                  | <b>Firstorder Maximum</b>                             | 1.06E-10   |
| 6                  | <b>Firstorder Mean</b>                                | 0.01466991 |
| 7                  | <b>Firstorder Mean Absolute Deviation</b>             | 0.00119999 |
| 8                  | <b>Firstorder Minimum</b>                             | 0.02584477 |
| 9                  | <b>Firstorder Range</b>                               | 5.79E-08   |
| 10                 | <b>Firstorder Robust Mean Absolute Deviation</b>      | 0.00123508 |
| 11                 | <b>Firstorder Root Mean Squared</b>                   | 0.00452603 |
| 12                 | <b>Firstorder Skewness</b>                            | 1.06E-10   |
| 13                 | <b>Firstorder Variance</b>                            | 0.00027519 |
| 14                 | <b>GLCM Cluster Prominence</b>                        | 0.00019394 |
| 15                 | <b>GLCM Cluster Shade</b>                             | 1.23E-09   |
| 16                 | <b>GLCM Cluster Tendency</b>                          | 0.00029227 |
| 17                 | <b>GLCM Contrast</b>                                  | 5.41E-10   |
| 18                 | <b>GLCM Correlation</b>                               | 1.24E-05   |
| 19                 | <b>GLCM Difference Average</b>                        | 1.55E-10   |
| 20                 | <b>GLCM Difference Entropy</b>                        | 1.07E-10   |
| 21                 | <b>GLCM Difference Variance</b>                       | 1.11E-10   |
| 22                 | <b>GLCM Id</b>                                        | 1.36E-10   |
| 23                 | <b>GLCM Idm</b>                                       | 1.43E-10   |
| 24                 | <b>GLCM Idmn</b>                                      | 5.58E-07   |
| 25                 | <b>GLCM Idn</b>                                       | 4.70E-10   |
| 26                 | <b>GLCM Imc1</b>                                      | 1.73E-10   |
| 27                 | <b>GLCM Imc2</b>                                      | 0.00092835 |
| 28                 | <b>GLCM Inverse Variance</b>                          | 1.24E-10   |
| 29                 | <b>GLCM Joint Energy</b>                              | 0.00063385 |
| 30                 | <b>GLCM Joint Entropy</b>                             | 3.64E-07   |
| 31                 | <b>GLCM Maximum Probability</b>                       | 0.00496733 |
| 32                 | <b>GLCM Sum Entropy</b>                               | 8.69E-06   |
| 33                 | <b>GLCM Sum Squares</b>                               | 0.00018272 |
| 34                 | <b>GLDM Dependence Entropy</b>                        | 2.14E-08   |
| 35                 | <b>GLDM Dependence Non Uniformity Normalized</b>      | 2.95E-10   |
| 36                 | <b>GLDM Dependence Variance</b>                       | 0.00193179 |
| 37                 | <b>GLDM Gray Level Variance</b>                       | 0.0002227  |
| 38                 | <b>GLDM Large Dependence Emphasis</b>                 | 1.16E-09   |
| 39                 | <b>GLDM Low Gray Level Emphasis</b>                   | 0.02110404 |
| 40                 | <b>GLDM Small Dependence Emphasis</b>                 | 0.00349533 |
| 41                 | <b>GLDM Small Dependence High Gray Level Emphasis</b> | 0.0017444  |
| 42                 | <b>GLRLM Gray Level Variance</b>                      | 0.00084841 |
| 43                 | <b>GLRLM High Gray Level Run Emphasis</b>             | 0.00143554 |
| 44                 | <b>GLRLM Long Run Emphasis</b>                        | 3.97E-06   |

|    |                                                   |            |
|----|---------------------------------------------------|------------|
| 45 | <b>GLRLM Long Run High Gray Level Emphasis</b>    | 8.93E-06   |
| 46 | <b>GLRLM Low Gray Level Run Emphasis</b>          | 0.00189904 |
| 47 | <b>GLRLM Run Percentage</b>                       | 6.57E-09   |
| 48 | <b>GLRLM Run Variance</b>                         | 1.84E-06   |
| 49 | <b>GLRLM Short Run Emphasis</b>                   | 5.90E-06   |
| 50 | <b>GLRLM Short Run High Gray Level Emphasis</b>   | 0.00071359 |
| 51 | <b>GLRLM Short Run Low Gray Level Emphasis</b>    | 1.06E-10   |
| 52 | <b>GLSZM Gray Level Non Uniformity Normalized</b> | 1.25E-10   |
| 53 | <b>GLSZM Gray Level Variance</b>                  | 6.25E-09   |
| 54 | <b>GLSZM High Gray Level Zone Emphasis</b>        | 0.00035915 |
| 55 | <b>GLSZM Large Area Emphasis</b>                  | 0.00239442 |
| 56 | <b>GLSZM Large Area High Gray Level Emphasis</b>  | 0.01690471 |
| 57 | <b>GLSZM Large Area Low Gray Level Emphasis</b>   | 0.00048366 |
| 58 | <b>GLSZM Low Gray Level Zone Emphasis</b>         | 1.23E-05   |
| 59 | <b>GLSZM Size Zone Non Uniformity Normalized</b>  | 1.06E-10   |
| 60 | <b>GLSZM Small Area Emphasis</b>                  | 1.06E-10   |
| 61 | <b>GLSZM SmallAreaLowGrayLevelEmphasis</b>        | 1.06E-10   |
| 62 | <b>GLSZM Zone Entropy</b>                         | 1.06E-10   |
| 63 | <b>GLSZM Zone Percentage</b>                      | 0.02236129 |
| 64 | <b>GLSZM Zone Variance</b>                        | 0.00243722 |
| 65 | <b>NGTDM Coarseness</b>                           | 4.01E-06   |
| 66 | <b>NGTDM Complexity</b>                           | 3.41E-08   |
| 67 | <b>NGTDM Contrast</b>                             | 9.77E-09   |
| 68 | <b>NGTDM Strength</b>                             | 1.45E-10   |
| 69 | <b>Shape2D Elongation</b>                         | 1.23E-07   |
| 70 | <b>Shape2D Perimeter</b>                          | 1.30E-10   |
| 71 | <b>Shape2D Sphericity</b>                         | 1.06E-10   |
